# Supplementary material for: A novel solid-state Li–O2 battery with an integrated electrolyte and cathode structure
Source: Royal Society of Chemistry journal article supplement (doi:10.1039/c5ee01604e), 2015-01-01
Supplement: c5ee01604e1.pdf [file c5ee01604e1.pdf]

## Supporting information for

### A novel solid-state Li-O<sub>2</sub> battery with an integrated electrolyte and cathode structure

X. B. Zhu, T. S. Zhao,\* Z. H. Wei, P. Tan and G. Zhao

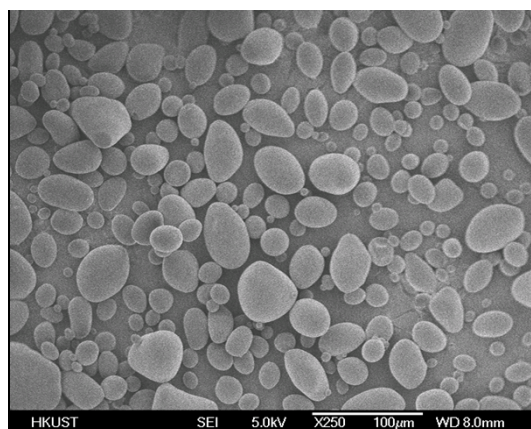

**Fig. S1** SEM image to show the particle dimensions of starch served as pore former in the preparation of porous cathode-support. The big particles in SEM image should be aggregation.

---

\* Department of Mechanical and Aerospace Engineering, The Hong Kong University of Science and Technology, Clear Water Bay, Kowloon, Hong Kong SAR, China. E-mail: [metzhao@ust.hk](mailto:metzhao@ust.hk) (T.S. Zhao)

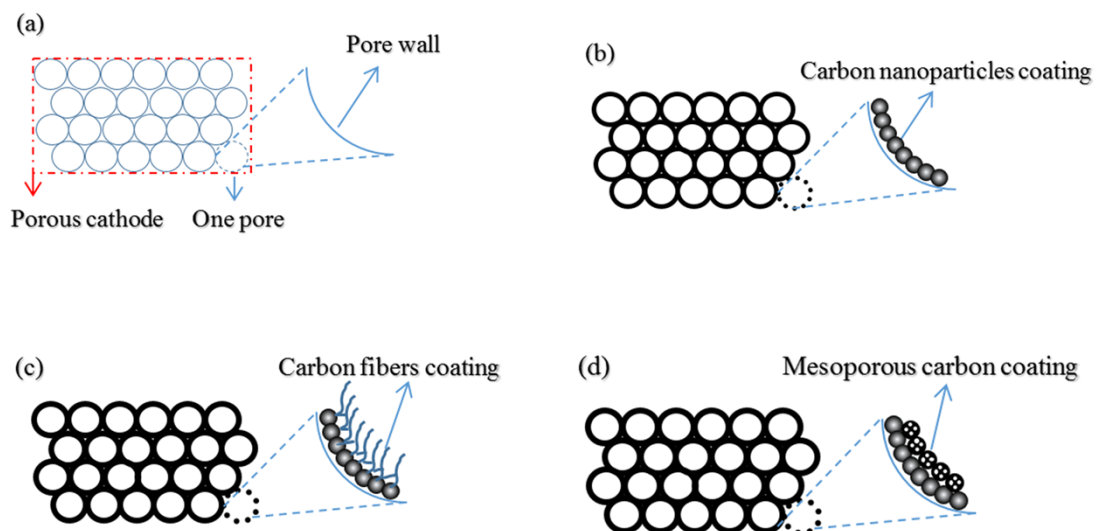

**Fig. S2** Schematic illustration of (a) a blank LTP cathode-support with a high porosity of 78%, (b) a LTP cathode-support coated with monolayer carbon nanoparticles, (c) a LTP cathode-support coated with a bilayer carbon coating (the top layer is carbon fibers and the bottom layer is carbon nanoparticles the same as (b)) and (d) a LTP cathode-support coated with a bilayer carbon coating (the top layer is mesoporous carbon and the bottom layer is carbon nanoparticles the same as (b)).

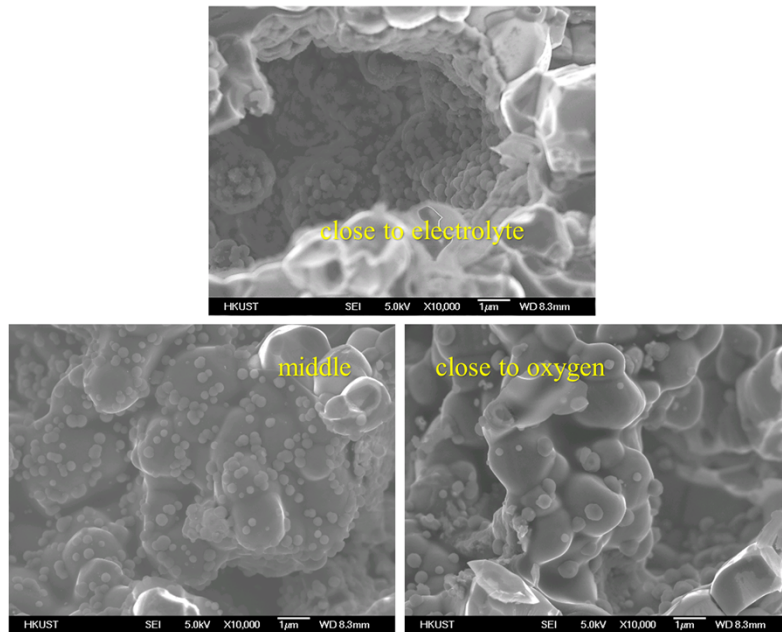

**Fig. S3** SEM images of the carbon-nanoparticles coated cathode (carbon loading,  $2 \text{ mg cm}^{-2}$ ) after discharging to 2.0 V at a constant current density of  $2.5 \text{ mA cm}^{-2}$  in pure oxygen. The comparison is used to demonstrate the gradient distribution of the discharge product.
